# Supplementary material for: Metabolic turnover rate, digestive enzyme activities, and bacterial communities in the white shrimp Litopenaeus vannamei under compensatory growth
Source: PeerJ. 2023 Feb 15;11:e14747. doi: 10.7717/peerj.14747 (PMC9938657; doi:10.7717/peerj.14747)
Supplement: Supplemental Information 1 [file peerj-11-14747-s001.xlsx]

## Sheet: Proximate analysis Table 1
Proximate analysis (% as is) of experimental diets
	Pre-conditioning	Reference
Moisture	9.25	9.31
	9.17	9.32
	9.3	9.3
Protein	36.72	35.61
	36.8	35.72
	36.88	35.6
Lipids	9.14	9.71
	9.22	9.65
	9.2	9.74
Crude fiber	0.236	0.128
	0.225	0.118
	0.234	0.124
Ash	14.42	12.29
	14.5	12.42
	14.46	12.39

## Sheet: Raw values Table 2
Treatment	Final weight	SGR (% day-1)	WG (%)	FI (g)	FCR	Survival (%)
Control	3.525	5.94532	701.136	3.992	1.294	100
Control	3.37375	5.82002	666.761	3.89335	1.32709	100
Control	3.24	5.70444	636.364	3.84035	1.37156	100
T3	3.42	5.85892	677.273	3.71994	1.2483	100
T3	3.62	5.95709	704.444	3.70831	1.16981	100
T3	3.36714	5.75021	648.254	3.68306	1.26256	90
T6	3.2008	5.66966	627.455	3.451	1.25	100
T6	3.21167	5.74503	646.899	3.42272	1.23046	100
T6	3.275	5.73514	644.318	3.45508	1.21872	80

## Sheet: Weight by week
	Day
Treatment	0	7	14	21	28	35
Control	0.44	0.8275	1.4	2.06	2.7	3.525
Control	0.44	0.7875	1.38	2.07	2.77	3.37375
Control	0.44	0.8075	1.4	1.98	2.73	3.24
Control	0.44	0.8075	1.39333	2.03667	2.73333
T3	0.44	0.705	1.22	1.83	2.62	3.42
T3	0.44	0.6975	1.29	2.01	2.7	3.62
T3	0.44	0.6975	1.26	1.85	2.7	3.36714
T3	0.44	0.7	1.25667	1.89667	2.67333
T6	0.43	0.5725	1.15	1.83	2.36	3.2
T6	0.44	0.6175	1.17	1.77	2.61	3.21167
T6	0.44	0.585	1.12	1.87	2.5	3.275
T6	0.44	0.591667	1.14667	1.82333	2.49

## Sheet: Mean Weekly feeding rate
	Mean weekly feeding rate according to shrimp biomass (%)
	1 -6 days	7 - 13 days	14 - 20 days	21 - 27 days	28 - 35 days
Control	12.9508	11.1239	8.15476	6.2945	5.64741
Control	13.0739	11.5	8.26087	6.19968	5.61372
Control	12.9754	11.4211	8.14286	6.45623	5.6044
Control	12.9754	11.4211	8.39498	6.12111
T3	8.98201	13.0319	9.39208	6.18852	5.71883
T3	9.13598	13.3978	9.01034	5.75423	5.59259
T3	9.1702	13.2079	9.25397	6.3986	5.39859
T3	9.1702	13.4	9.27851	6.24976
T6	3.87733	14.4134	9.97942	6.12805	5.99576
T6	3.87784	13.5897	9.92165	6.59134	5.51724
T6	3.87784	14.3447	10.3646	6.37255	5.7
T6	3.87784	14.1831	10.1235	6.35283

## Sheet: Trypsin
	Trypsin U*mg prot
	Day 9	Day 14	Day 35
Control	350.396	329.856	358.556
Control	408.44	330.8	318.193
Control	345.193	375.516	352.789
Control	400.631	445.578	351.732
T3	428.596	374.143	340.367
T3	452.394	412.602	334.843
T3	491.304	313.677	357.024
T3	449.047	374.598	374.783
T6	403.51	338.424	347.075
T6	435.445	374.169	349.235
T6	442.777	418.366	356.909
T6	445.224	368.706	380.251

## Sheet: Amilase
	Amilase U*mg prot
	Day 9	Day 14	Day 35
Control	0.00108231	0.00148022	0.00139939
Control	0.00121281	0.000962225	0.00138215
Control	0.00144158	0.000949008	0.000950868
Control	0.00182412	0.00105377	0.00102134
T3	0.00127601	0.00111695	0.00103665
T3	0.00178433	0.00141592	0.00107793
T3	0.00169146	0.00122455	0.00107447
T3	0.00184863	0.0009467	0.00115437
T6	0.00084362	0.00128761	0.00109133
T6	0.00104134	0.00109923	0.0014813
T6	0.00105796	0.00109354	0.0013216
T6	0.000957983	0.00108114	0.00108585

## Sheet: Lipase
	Lipase U*mg prot
	Day 9	Day 14	Day 35
Control	47.0342	41.9369	42.6965
Control	44.1747	40.14	42.7501
Control	44.6799	38.1247	43.9537
Control	45.6025	39.13	46.4131
T3	52.0037	42.5367	40.8678
T3	46.3675	53.4893	44.6507
T3	50.1289	38.999	44.8987
T3	52.3296	40.7358	40.6541
T6	50.9521	39.5378	44.1453
T6	64.5094	41.8408	45.0665
T6	51.6618	39.0167	49.7584
T6	53.7533	39.3621	48.6533

## Sheet: raw data Isotopes
	δ15NAir (‰)
Tref D0 R1	8.62669
Tref D0 R2	8.39221
Tref D0 R3	8.55864
TC D3 R1	9.35399
TC D3 R2	9.75242
TC D3 R3	9.9116
T3 D3 R1	8.92337
T3 D3 R2	9.15518
T3 D3 R3	9.76698
TC D6 R1	11.7394
TC D6 R2	10.6973
TC D6 R3	11.031
T3 D6 R1	11.2445
T3 D6 R2	9.92255
T3 D6 R3	10.4833
T6 D6 R1	9.66064
T6 D6 R2	10.131
T6 D6 R3	9.22939
TC D9 R1	12.3481
TC D9 R2	12.5072
TC D9 R3	11.8524
T3 D9 R1	11.9902
T3 D9 R2	11.7608
T3 D9 R3	11.9569
T6 D9 R1	11.219
T6 D9 R2	10.7942
T6 D9 R3	11.071
TC D14 R1	13.1129
TC D14 R2	12.9594
TC D14 R3	13.2265
T3 D14 R1	13.2132
T3 D14 R2	12.4552
T3 D14 R3	12.4944
T6 D14 R1	12.3978
T6 D14 R2	13.2909
T6 D14 R3	12.369
TC D21 R1	13.8636
TC D21 R2	14.0756
TC D21 R3	14.1827
T3 D21 R1	13.654
T3 D21 R2	14.0385
T3 D21 R3	13.6724
T6 D21 R1	13.2651
T6 D21 R2	13.6478
T6 D21 R3	13.6534
TC D28 R1	13.987
TC D28 R2	13.8924
TC D28 R3	13.8243
T3 D28 R1	14.3593
T3 D28 R2	13.3747
T3 D28 R3	14.0753
T6 D28 R1	13.8472
T6 D28 R2	14.2299
T6 D28 R3	13.9726
TC D35 R1	14.2934
TC D35 R2	14.6622
TC D35 R3	14.0767
T3 D35 R1	14.1301
T3 D35 R2	14.3721
T3 D35 R3	14.6975
T6 D35 R1	14.4946
T6 D35 R2	13.9877
T6 D35 R3	14.0921

## Sheet: k, m and t50
	k (day-1)	*m (day-1)	t50 indiv
Control	0.0521	0.034	8.4
Control	0.0498	0.0321	8.2
Control	0.0519	0.0342	8.4
T3	0.0564	0.0165	8.9
T3	0.0568	0.0169	8.9
T3	0.059	0.0196	9.2
T6	0.0611	0.0082	10
T6	0.0625	0.0098	10.2
T6	0.0602	0.0071	9.8
